# Supplementary material
Source: MDPI journal article supplement (https://www.mdpi.com/2073-4352/14/5/401)
Supplement: s1 [file s1]

## **SUPPORTING INFORMATION**

### ***Distinct Crystallization Pathways of Polyoxymethylene in methanol system***

*Haowen Du<sup>1</sup>, Xiaomeng Zhou<sup>1</sup>, Yaru Zhang<sup>1</sup>, Yang Ye<sup>1</sup>, Shutian Xuanyuan<sup>1</sup>, Sen Yang<sup>1</sup>, Guorui Lao<sup>2</sup>, and  
Chuang Xie<sup>1,3,\*</sup>*

<sup>1</sup>School of Chemical Engineering and Technology, Tianjin University, Tianjin 300072, China

<sup>2</sup>China Kunlun Contracting & Engineering Corporation, Beijing 100037, China

<sup>3</sup>National Engineering Research Center of Industrial Crystallization Technology, Tianjin University, Tianjin 300072,  
China

\*Correspondence: [acxie@tju.edu.cn](mailto:acxie@tju.edu.cn)

## Table of Contents

|                                                                                                                                                                   |   |
|-------------------------------------------------------------------------------------------------------------------------------------------------------------------|---|
| <b>Figure S1.</b> (a-b) SEM morphology of the product removed at 130 °C. and (c-d) SEM morphology of the product removed at 25°C. ....                            | 3 |
| <b>Table S1.</b> Solubility and cloud point of the POM-methanol system. ....                                                                                      | 3 |
| <b>Figure S2.</b> (a) Melting point of POM at 160°C. (b) Molten POM at 127 °C from the crystal. and (c) PXRD patterns of POM raw materials and two products. .... | 4 |
| <b>Figure S3.</b> Heat flow rate versus time plot for raw materials and products (a) raw materials. and (b) large particles. ....                                 | 4 |
| <b>Figure S4.</b> Fitted Arrhenius equation for POM raw materials and large particle products. ....                                                               | 4 |
| <b>Table S2.</b> Relevant data from the Arrhenius equation. ....                                                                                                  | 5 |

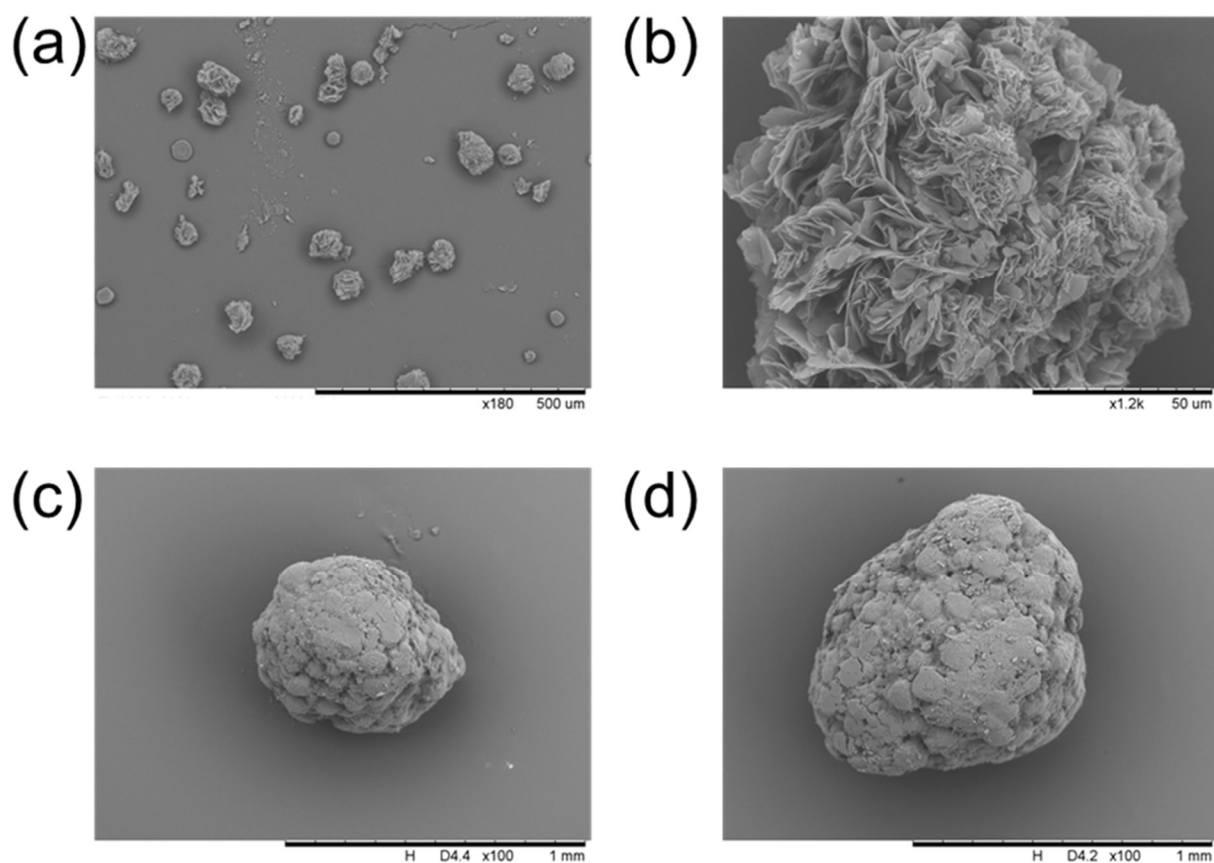

**Figure S1.** (a-b) SEM morphology of the product removed at 130 °C. and (c-d) SEM morphology of the product removed at 25°C.

**Table S1.** Solubility and cloud point of the POM-methanol system.

| POM Concentration<br>(g/100g) | Dissolving Temperature (°C) |       |       | Cloud Point (°C) |       |       |
|-------------------------------|-----------------------------|-------|-------|------------------|-------|-------|
|                               |                             |       |       |                  |       |       |
| 0.0304                        | 133.5                       | 133.3 | 133.8 | 122              | 121.2 | 121.5 |
| 0.051                         | 135.4                       | 135.5 | 135.7 | 125.3            | 125.8 | 125.2 |
| 0.0805                        | 136.7                       | 136.4 | 136.4 | 126              | 126.3 | 125.9 |
| 0.1003                        | 138.2                       | 138.3 | 137.8 | 126.5            | 126.3 | 126.8 |
| 0.1516                        | 141.9                       | 141.7 | 141.9 | 127.5            | 127.3 | 127.8 |
| 0.2017                        | 146.7                       | 146.5 | 146.9 | 129.4            | 129.5 | 128.8 |

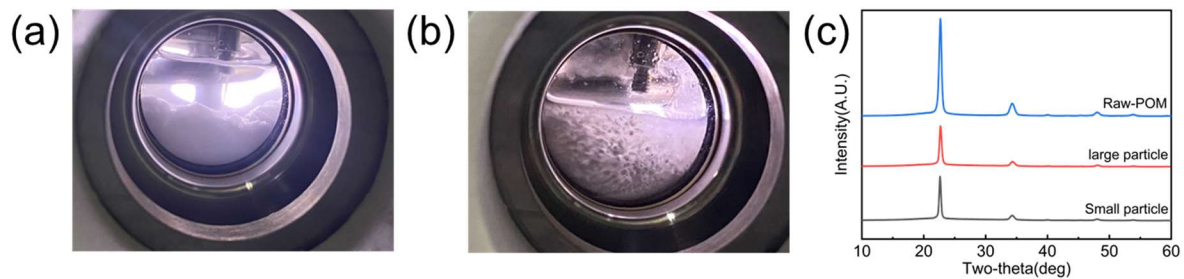

**Figure S2.** (a) Melting point of POM at 160°C. (b) Molten POM at 127 °C from the crystal. and (c) PXRD patterns of POM raw materials and two products.

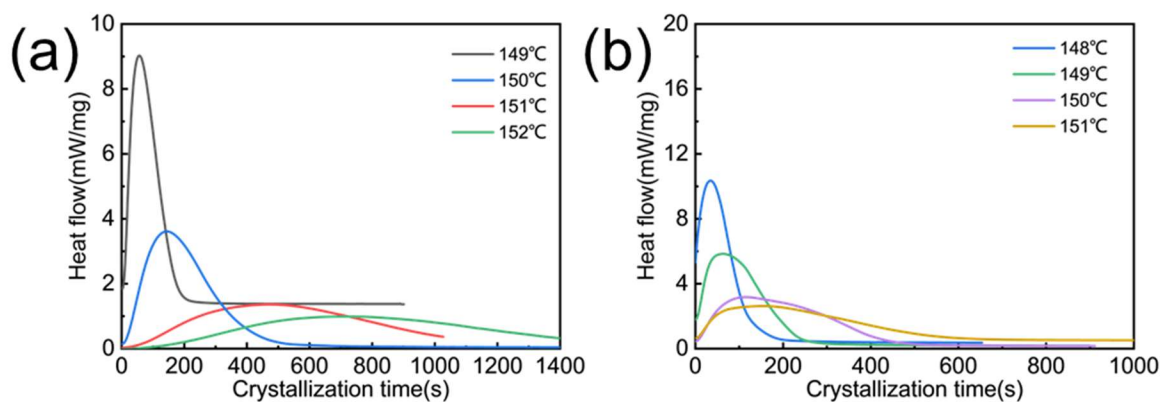

**Figure S3.** Heat flow rate versus time plot for raw materials and products (a) raw materials. and (b) large particles.

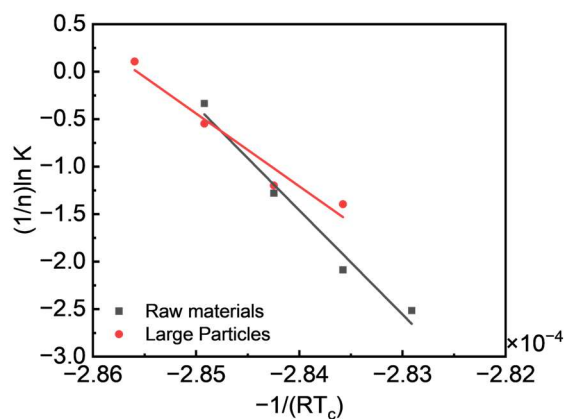

**Figure S4.** Fitted Arrhenius equation for POM raw materials and large particle products.

**Table S2.** Relevant data from the Arrhenius equation.

| Sample          | $\Delta E_a(\text{kJ/mol})$ | $R^2$ |
|-----------------|-----------------------------|-------|
| Raw materials   | -312.883                    | 0.975 |
| Large particles | -218.845                    | 0.956 |
